# Supplementary material
Source: Springer Nature journal article supplement (https://www.springermedizin.de/resource/supplementary/12936_2010_1368_MOESM5_ESM.pdf/9549616)
Supplement: MOESM5 [file 9549616]

A.

| Lane number | Theoretical pH range | Observed pH range |
|-------------|----------------------|-------------------|
| 1           | Up to 3.6            | Up to 4.7         |
| 2           | 3.6 to 4.2           | 4.7 to 5.1        |
| 3           | 4.2 to 4.7           | 5.1 to 5.6        |
| 4           | 4.7 to 5.3           | 5.6 to 6.1        |
| 5           | 5.3 to 5.9           | 6.1 to 6.5        |
| 6           | 5.9 to 6.5           | 6.5 to 7.0        |
| 7           | 6.5 to 7.1           | 7.0 to 7.5        |
| 8           | 7.1 to 7.6           | 7.5 to 7.9        |
| 9           | 7.6 to 8.2           | 7.9 to 8.4        |
| 10          | 8.2 to 8.8           | 8.4 to 8.8        |
| 11          | 8.8 to 9.2           | 8.8 to 9.3        |
| 12          | 9.2 and upwards      | 9.3 and upwards   |

B.

---

1 2 3 4 5 6 7 8 9 10 11 12
